# Supplementary material for: SARS-CoV-2 Orf6 Triggers MTCH1-Dependent Mitochondrial Dysfunction and Necroptosis in Human Neurons
Source: Research Square preprint supplement (doi:10.21203/rs.3.rs-7291444/v1), 2025-09-08
Supplement: Supplementary file 2 [file 2d548cca02af87fb1d095873.docx]

**Supplementary**

**
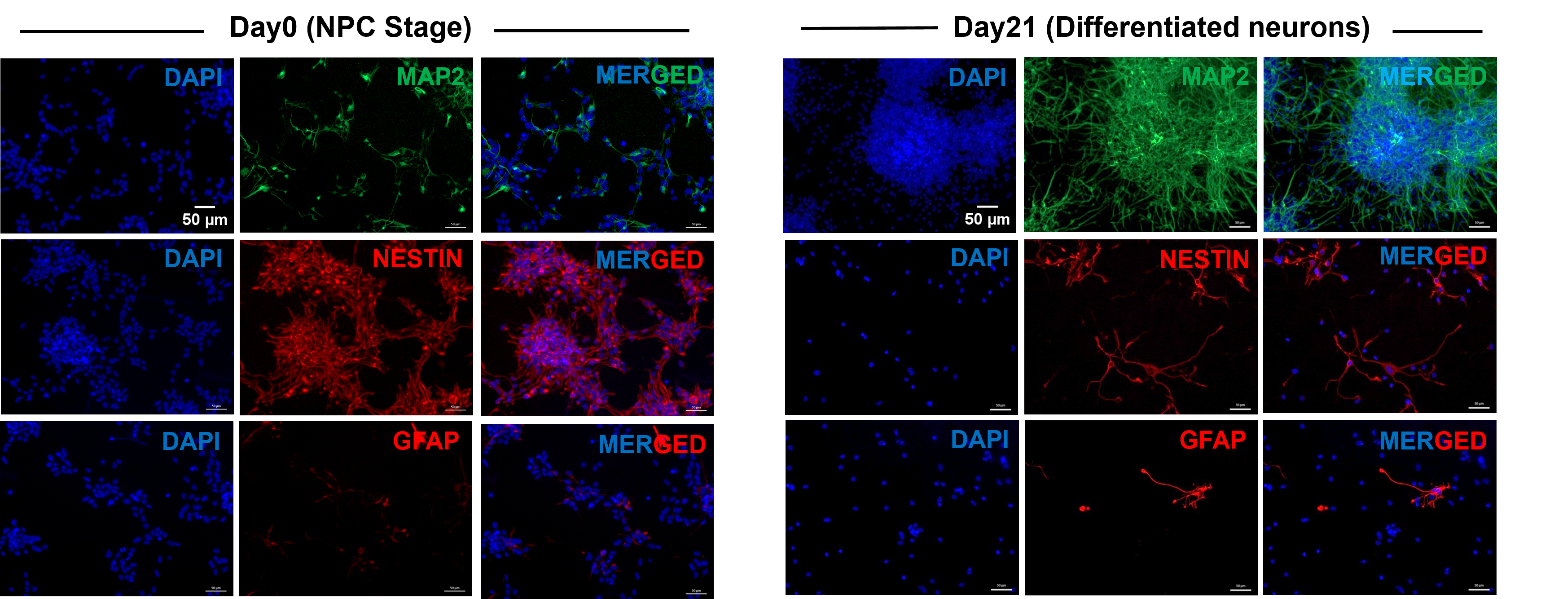
**

**Figure S1** Fluorescence microscope images showing neuronal markers, MAP2, nestin, and astrocytic marker, GFAP in neural progenitor cells before (left panel) and after (right panel) neuronal differentiation. Scale bar, 50µm.


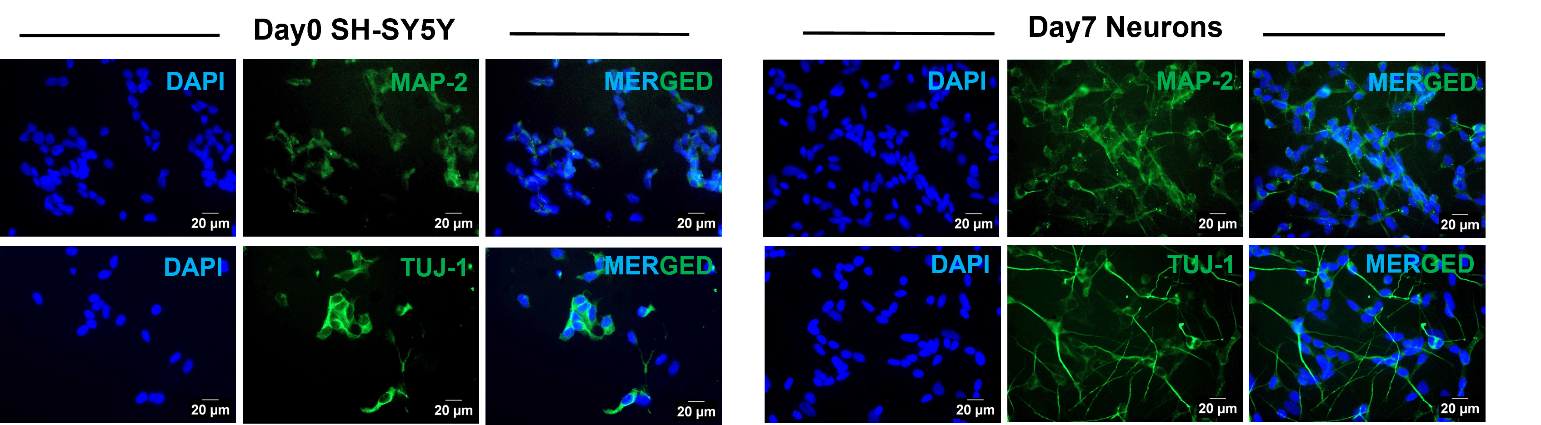


**Figure S2** Fluorescence microscope images showing neuronal markers MAP2 and TUJ1 in SHSY-5Y cells before (left panel), and after (right panel) differentiation. Scale bar, 20µm.

.
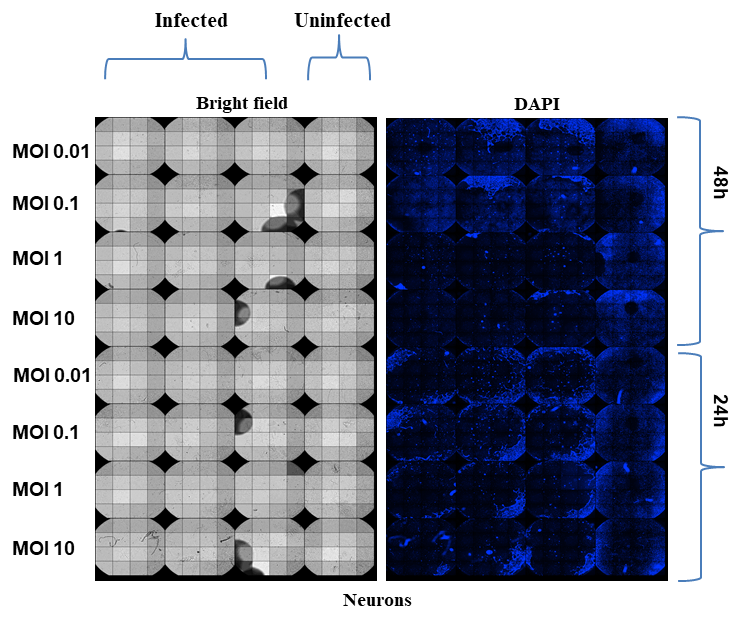


**Figure S3** Microscopy images showing cell death with DAPI staining, at different MOI and time points, post SARS-CoV-2 infection in 96 well plate.

**A**  **B**
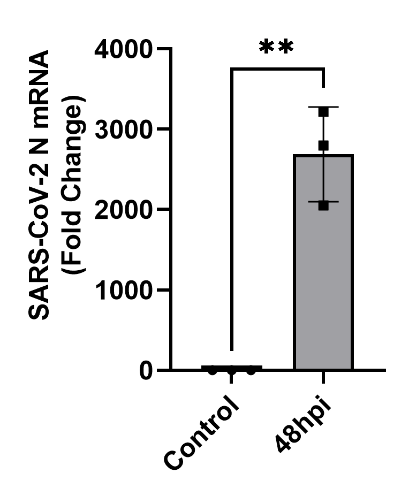


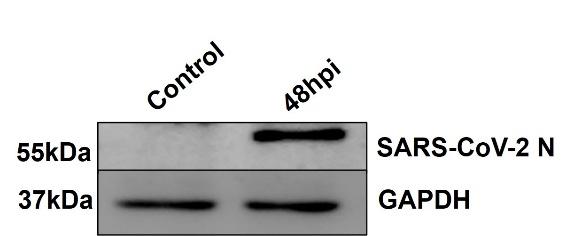


**Figure S4 A**) Bar graph shows relative mRNA expression of SARS-CoV-2 nucleocapsid (N) and **B)** Representative western blot image shows the expression of SARS-CoV-2 N protein in infected neurons. GAPDH was used as a loading control.


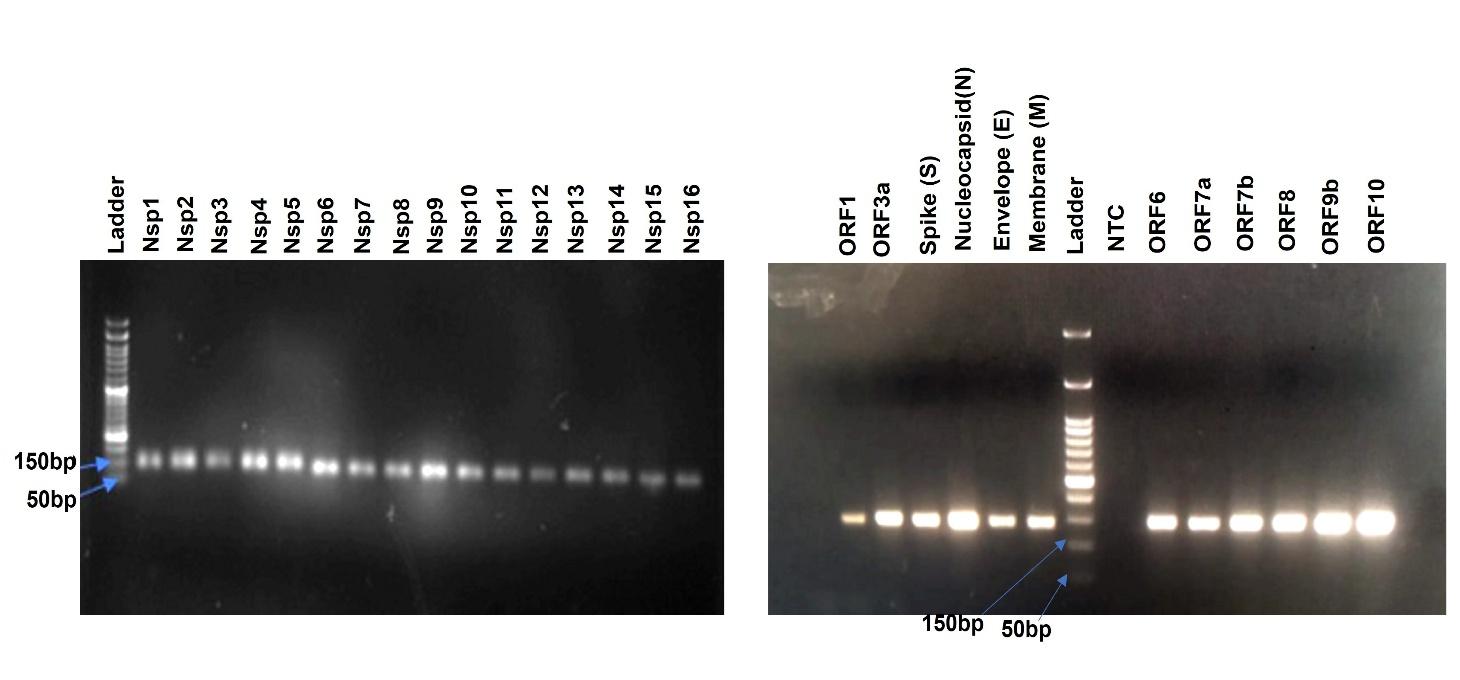


**Figure S5** Representative agarose gel picture showing the PCR amplicons of respective SARS-CoV-2 genes in mRNA extracted from transduced HEK293T cells. NTC represents non-target control.

**A**


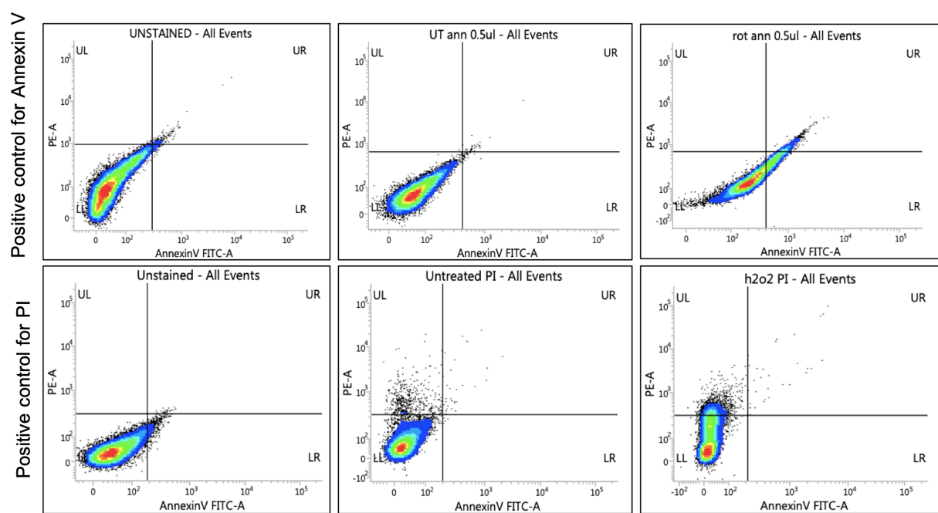


**B**


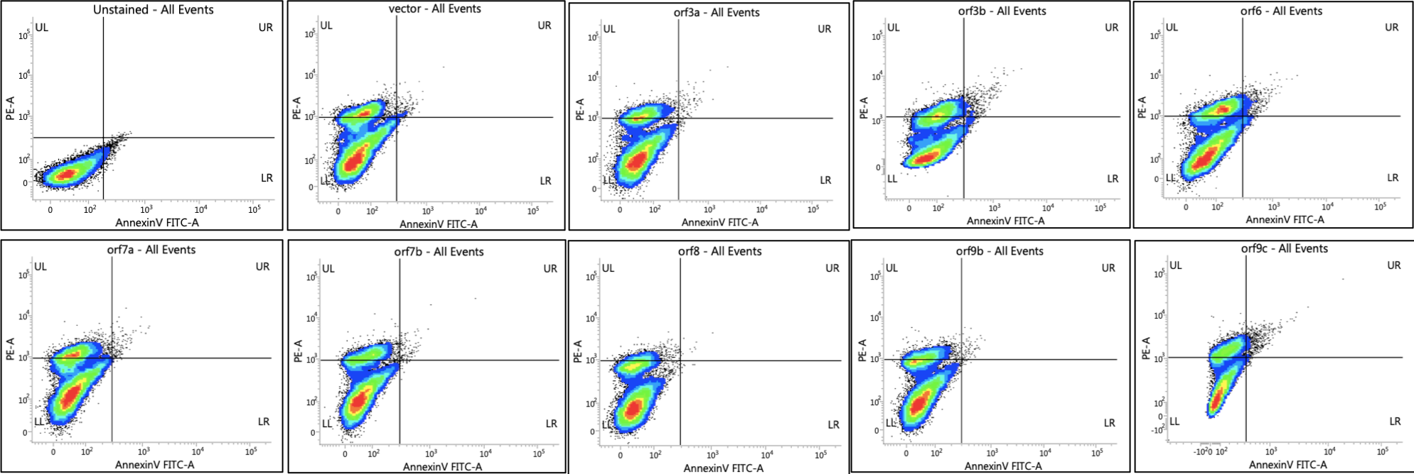


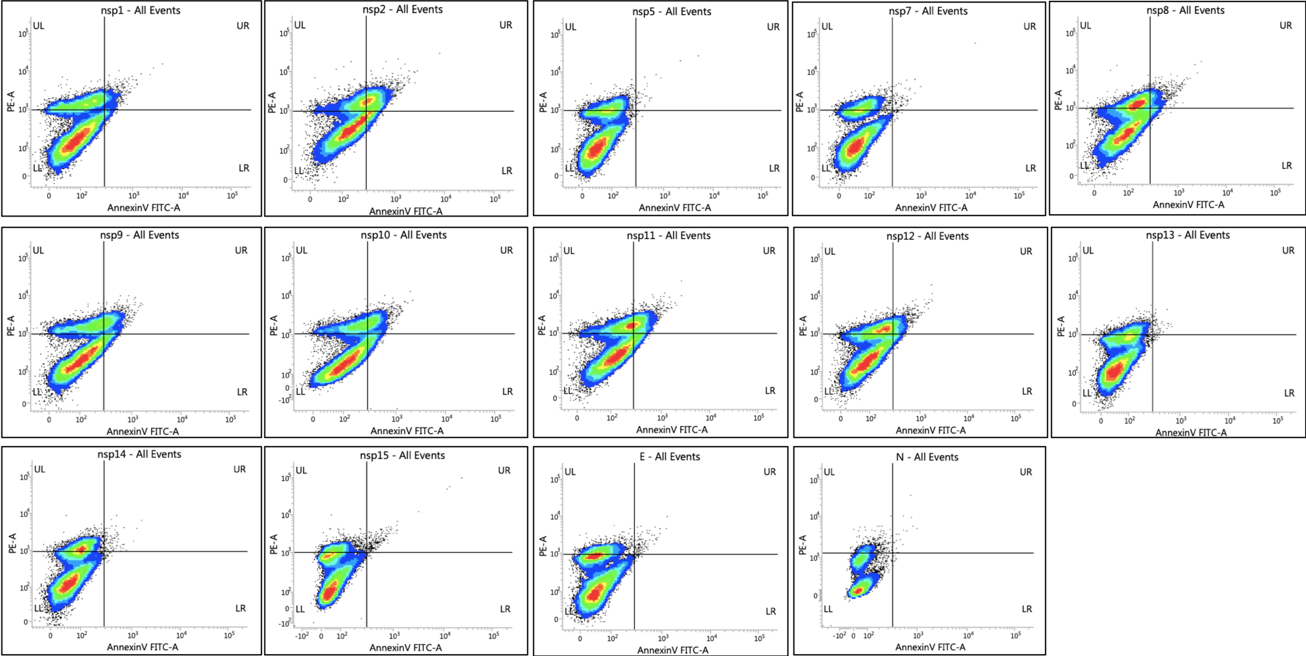


**Figure S6** Representative FACS density plots showing AnnexinV/PI staining. **A)** Top panel shows density plots for unstained (leftmost), untreated stained with only AnnexinV (middle) and rotenone treated, AnnexinV stained (rightmost) cells. Bottom panel shows density plots for unstained (leftmost), untreated, stained with only PI (middle), and H2O2 treated, PI stained (rightmost) cells. **B)** Representative density plots showing AnnexinV/PI staining in indicated viral protein expressing cells. Vector refers to the empty vector control.

**A**

**Splash RNA (shRNA sequence for MTCH1 knockdown)**

**Sense Antisense**

1. 5’-GACTATCATATGCTTACCGTAACTTGAAAGTATTTCGATTTCTTGGCTTTATATATCTTGTGGAAAGGACGAAACACCGGCTTCCCTGAAGAAAGTTGTGAACTCGAGTTCACAACTTTCTTCAGGGAAGTTTTTGAATTCTCGACC-3’

2. 5’-GACTATCATATGCTTACCGTAACTTGAAAGTATTTCGATTTCTTGGCTTTATATATCTTGTGGAAAGGACGAAACACCGGCTGGGATTCTTCGTTGGATTAACTCGAGTTAATCCAACGAAGAATCCCAGTTTTTGAATTCTCGACC-3’

**B**
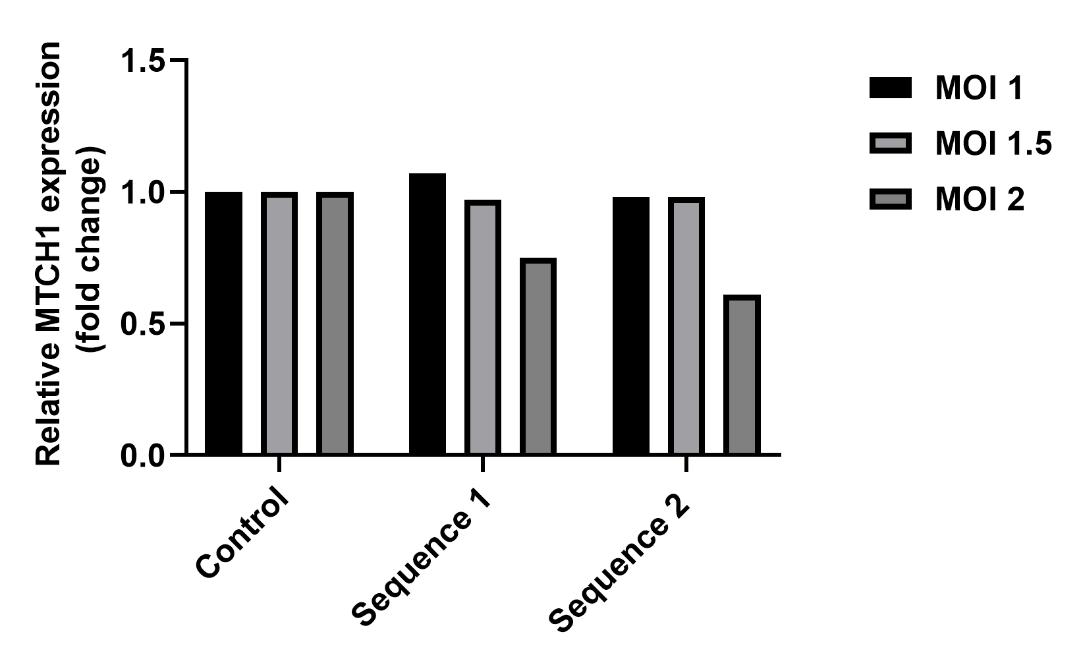


**Figure S7** MTCH1 shRNA sequences used to target MTCH1 and its effect on MTCH1 mRNA expression at different MOIs. **A)** Nucleotide sequence of the shRNA construct used to target MTCH1. The sense and antisense strands are shown, including the loop sequence, designed according to the standard shRNA construction protocol. Yellow and red highlighted sequence shows restriction sites for NdeI and EcoRI **B)** Bar graph shows relative MTCH1 expression 48hrs following transduction with the indicated shRNA at varying multiplicities of infection. GAPDH was used as a housekeeping control.

**Table 1:** List of primers for RT-qPCR

| **Gene** | **Forward Primer (5’-3’)** | **Reverse Primer (5’-3’)** |
| --- | --- | --- |
| **MLKL** | AGAGCTCCAGTGGCCATAAA | TACGCAGGATGTTGGGAGAT |
| **RIPK3** | GACTCCCGGCTTAGAAGGACT | CTGCTCTTGAGCTGAGACAGG |
| **Caspase3** | TGTTTGTGTGCTTCTGAGCC | CACGCCATGTCATCATCAAC |
| **LC3BII** | GAGAAGCAGCTTCCTGTTCTGG | GTGTCCGTTCACCAACAGGAAG |
| **Caspase1** | GCCTGTTCCTGTGATGTGGAG | TGCCCACAGACATTCATACAGTTTC |
| **MTCH1** | TACGTGAAGCTGCTCATCCA | CTTGGCGTAGGTGAAGAAGC |

**Table 2:** List of antibodies for western blotting

| **Antibody** | **Company** | **Catalog number** |
| --- | --- | --- |
| **pMLKL** | Cell Signalling Technology | 91689 |
| **pRIPK3** | Cell Signalling Technology | 93654 |
| **Cleaved Caspase 3** | Cell Signalling Technology | 9661 |
| **Cleaved Caspase 1** | Cell Signalling Technology | 4199 |
| **LC3BII** | Sigma | L7543 |
| **MTCH1** | Abcam | ab230006 |
| **Anti-strepII** | Abcam | ab184224 |
| **β-actin** | Sigma | A3854 |
| **Gapdh** | Santa Cruz | sc-32233 |
| **MAP2** | Abcam | ab11268 |
| **Nestin** | Millipore Sigma | AB5922 |
| **GFAP** | Dako | Z0334 |

**Table 3:** List of SARS-CoV-2 plasmids

| **Gene** | **Without Insert(bp)** | **With Insert(bp)** |
| --- | --- | --- |
| Orf3a | 8825 | 9738 |
| Orf3b | 8825 | 9078 |
| Orf6 | 8825 | 9096 |
| E | 8825 | 9138 |
| N | 8825 | 10170 |
| Orf7a | 8825 | 9276 |
| Orf7b | 8825 | 9036 |
| Orf8 | 8825 | 9276 |
| Orf9b | 8825 | 9204 |
| Orf9c | 8825 | 9126 |
| Nsp1 | 8825 | 9453 |
| Nsp2 | 8825 | 10830 |
| Nsp5 | 8825 | 9834 |
| Nsp7 | 8825 | 9165 |
| Nsp8 | 8825 | 9510 |
| Nsp9 | 8825 | 9255 |
| Nsp10 | 8825 | 9333 |
| Nsp11 | 8825 | 8955 |
| Nsp12 | 8825 | 11712 |
| Nsp13 | 8825 | 10719 |
| Nsp14 | 8825 | 10491 |
| Nsp15 | 8825 | 9954 |
| Empty | 8825 | 8825 |
