# Supplementary figures and images for: SARS-CoV-2 Orf6 Triggers MTCH1-Dependent Mitochondrial Dysfunction and Necroptosis in Human Neurons
Source: Research Square preprint supplement (doi:10.21203/rs.3.rs-7291444/v1), 2025-09-08

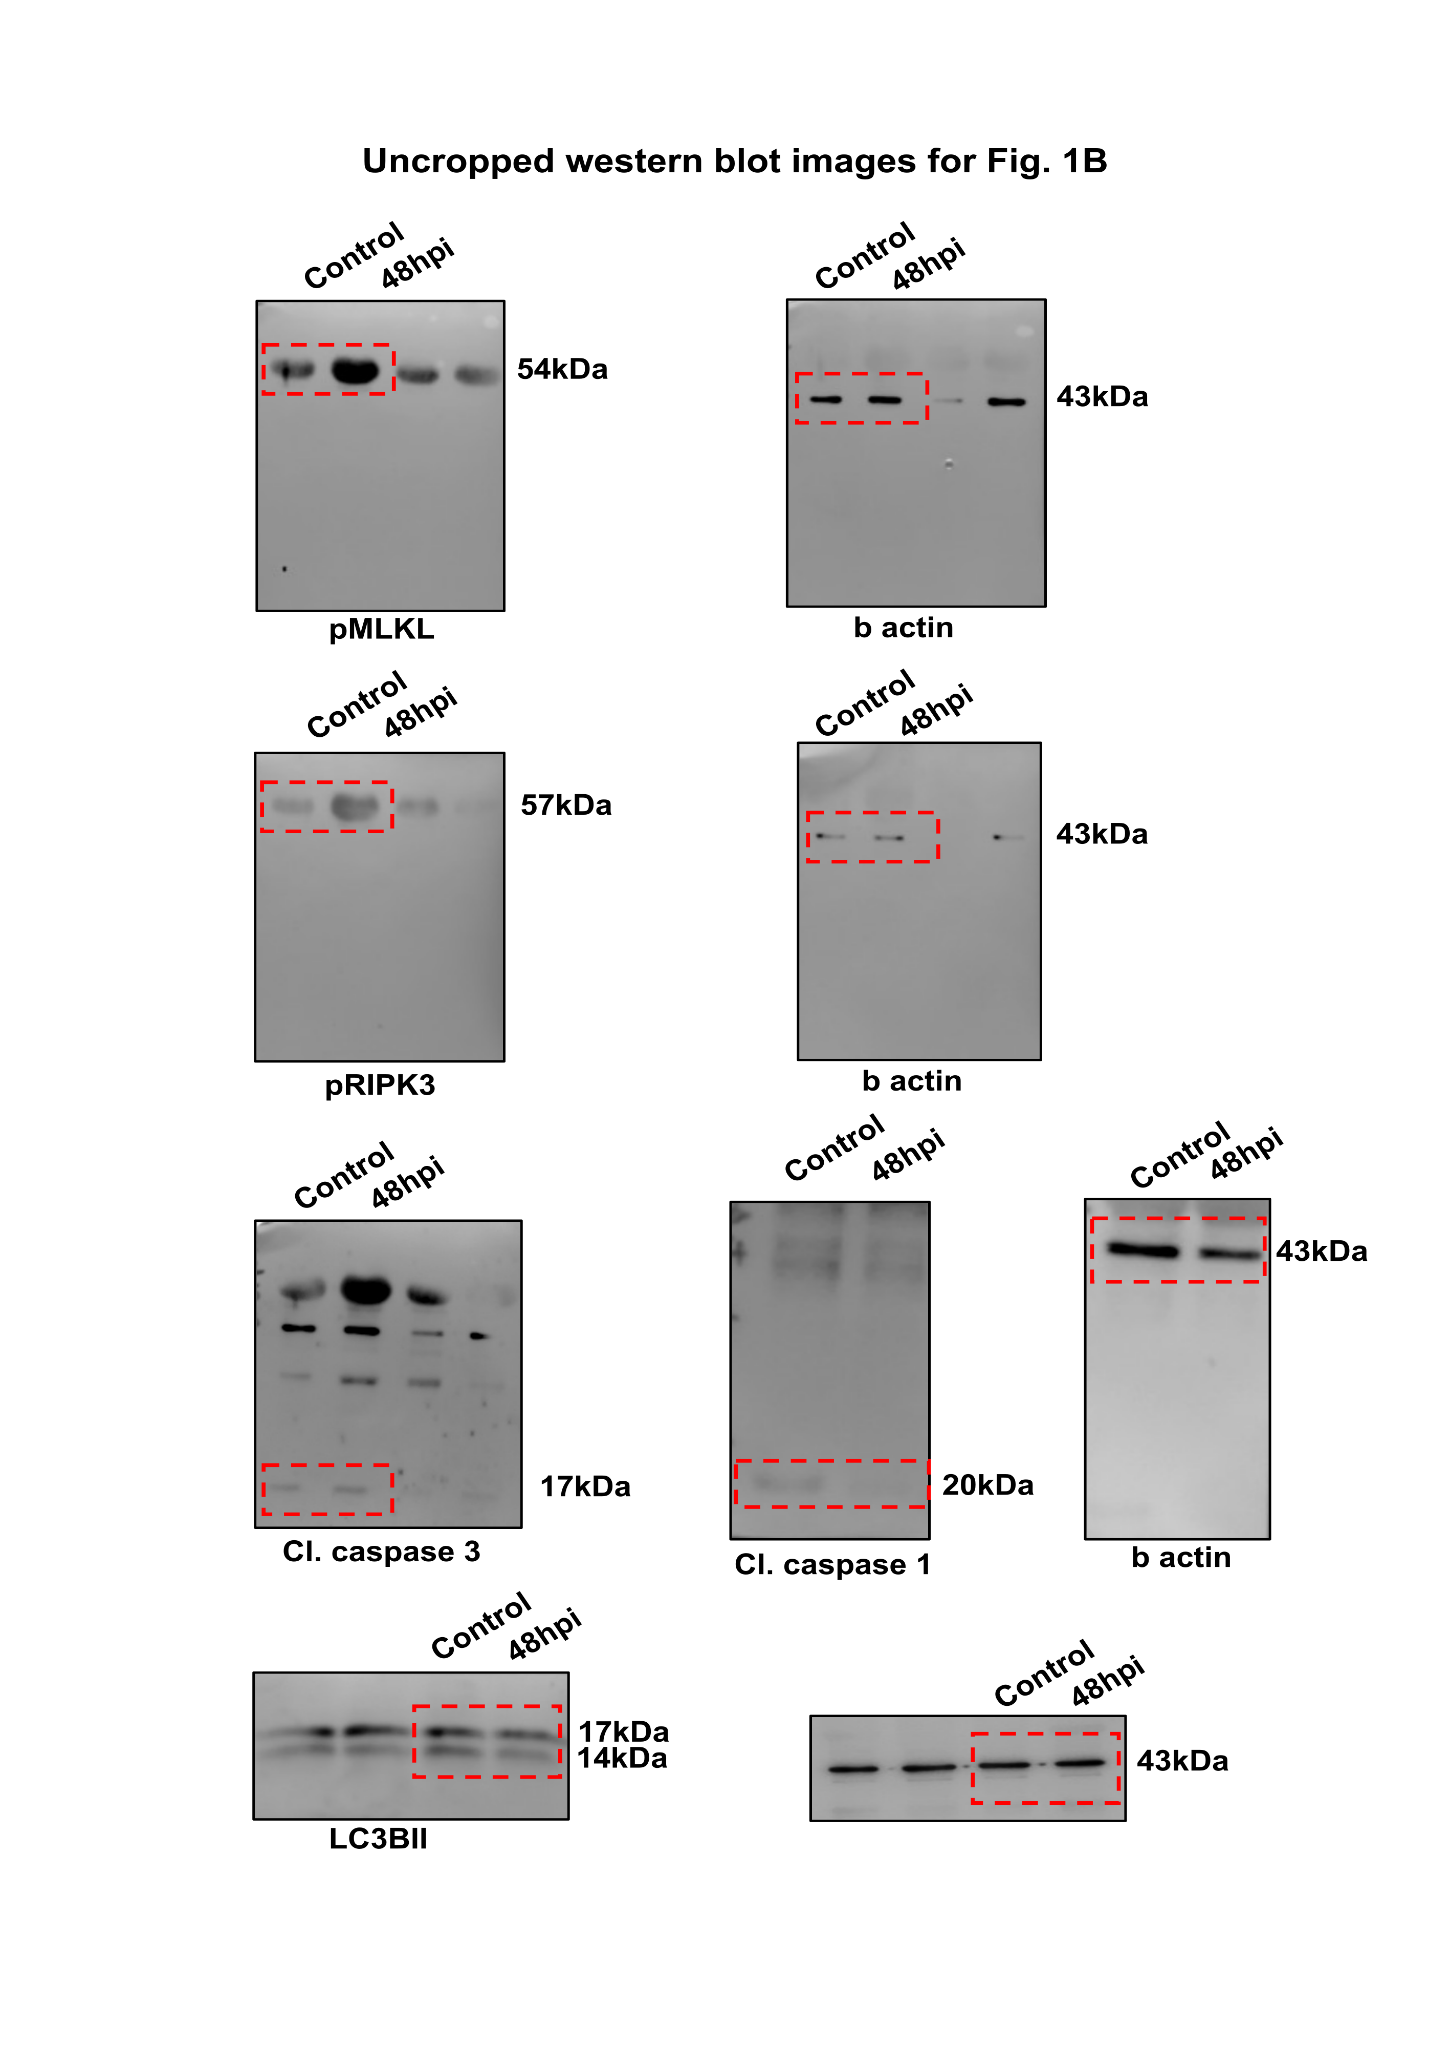


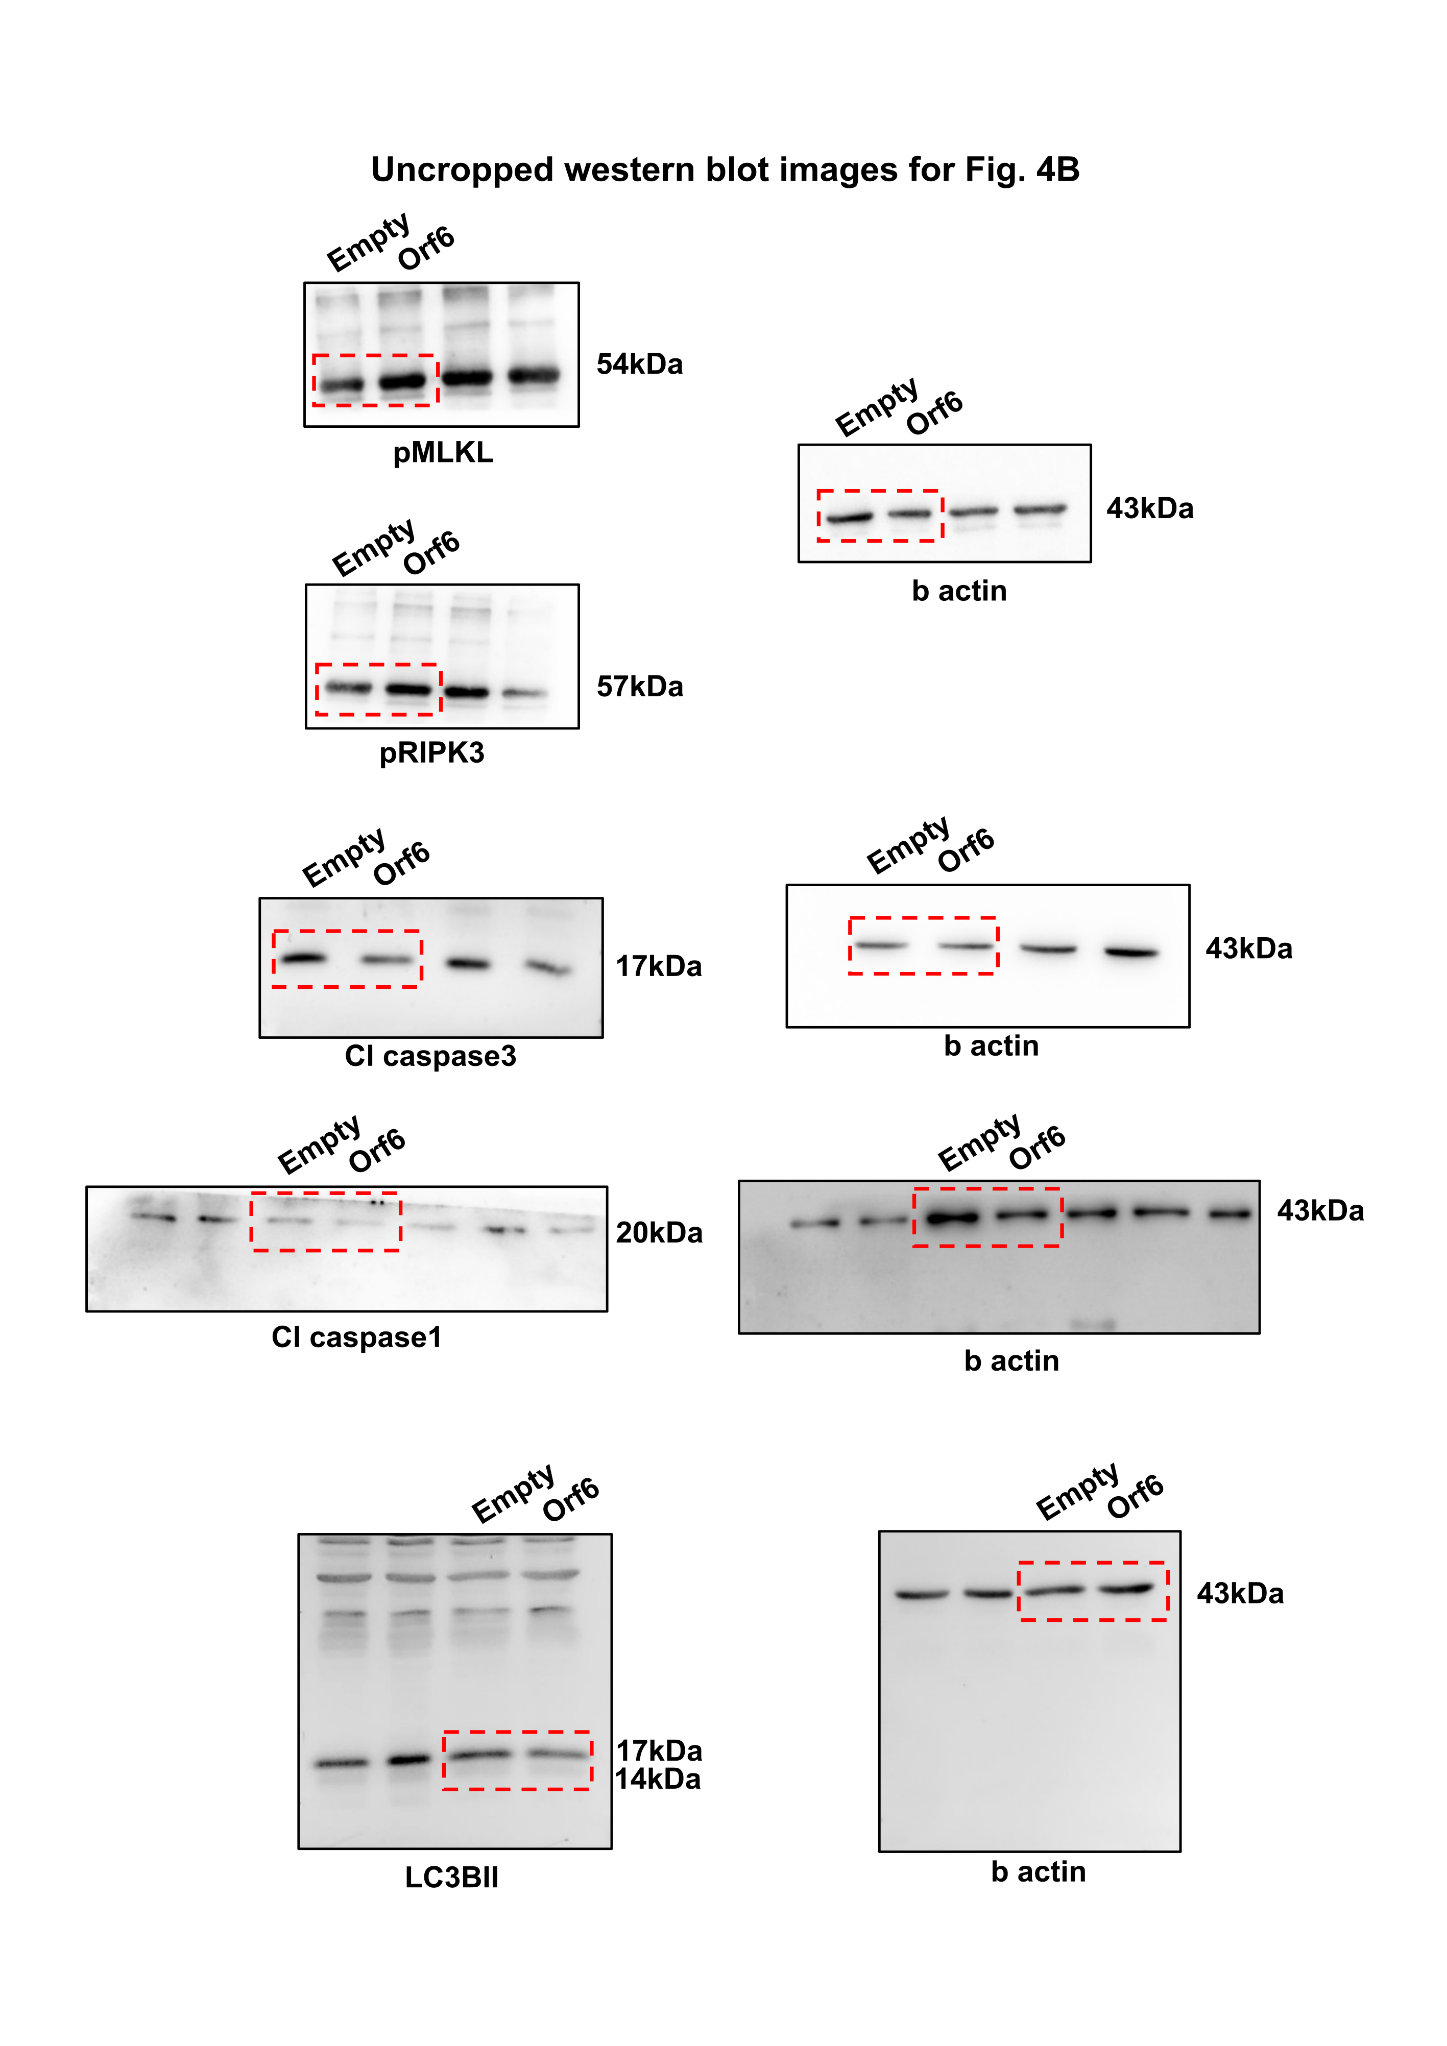


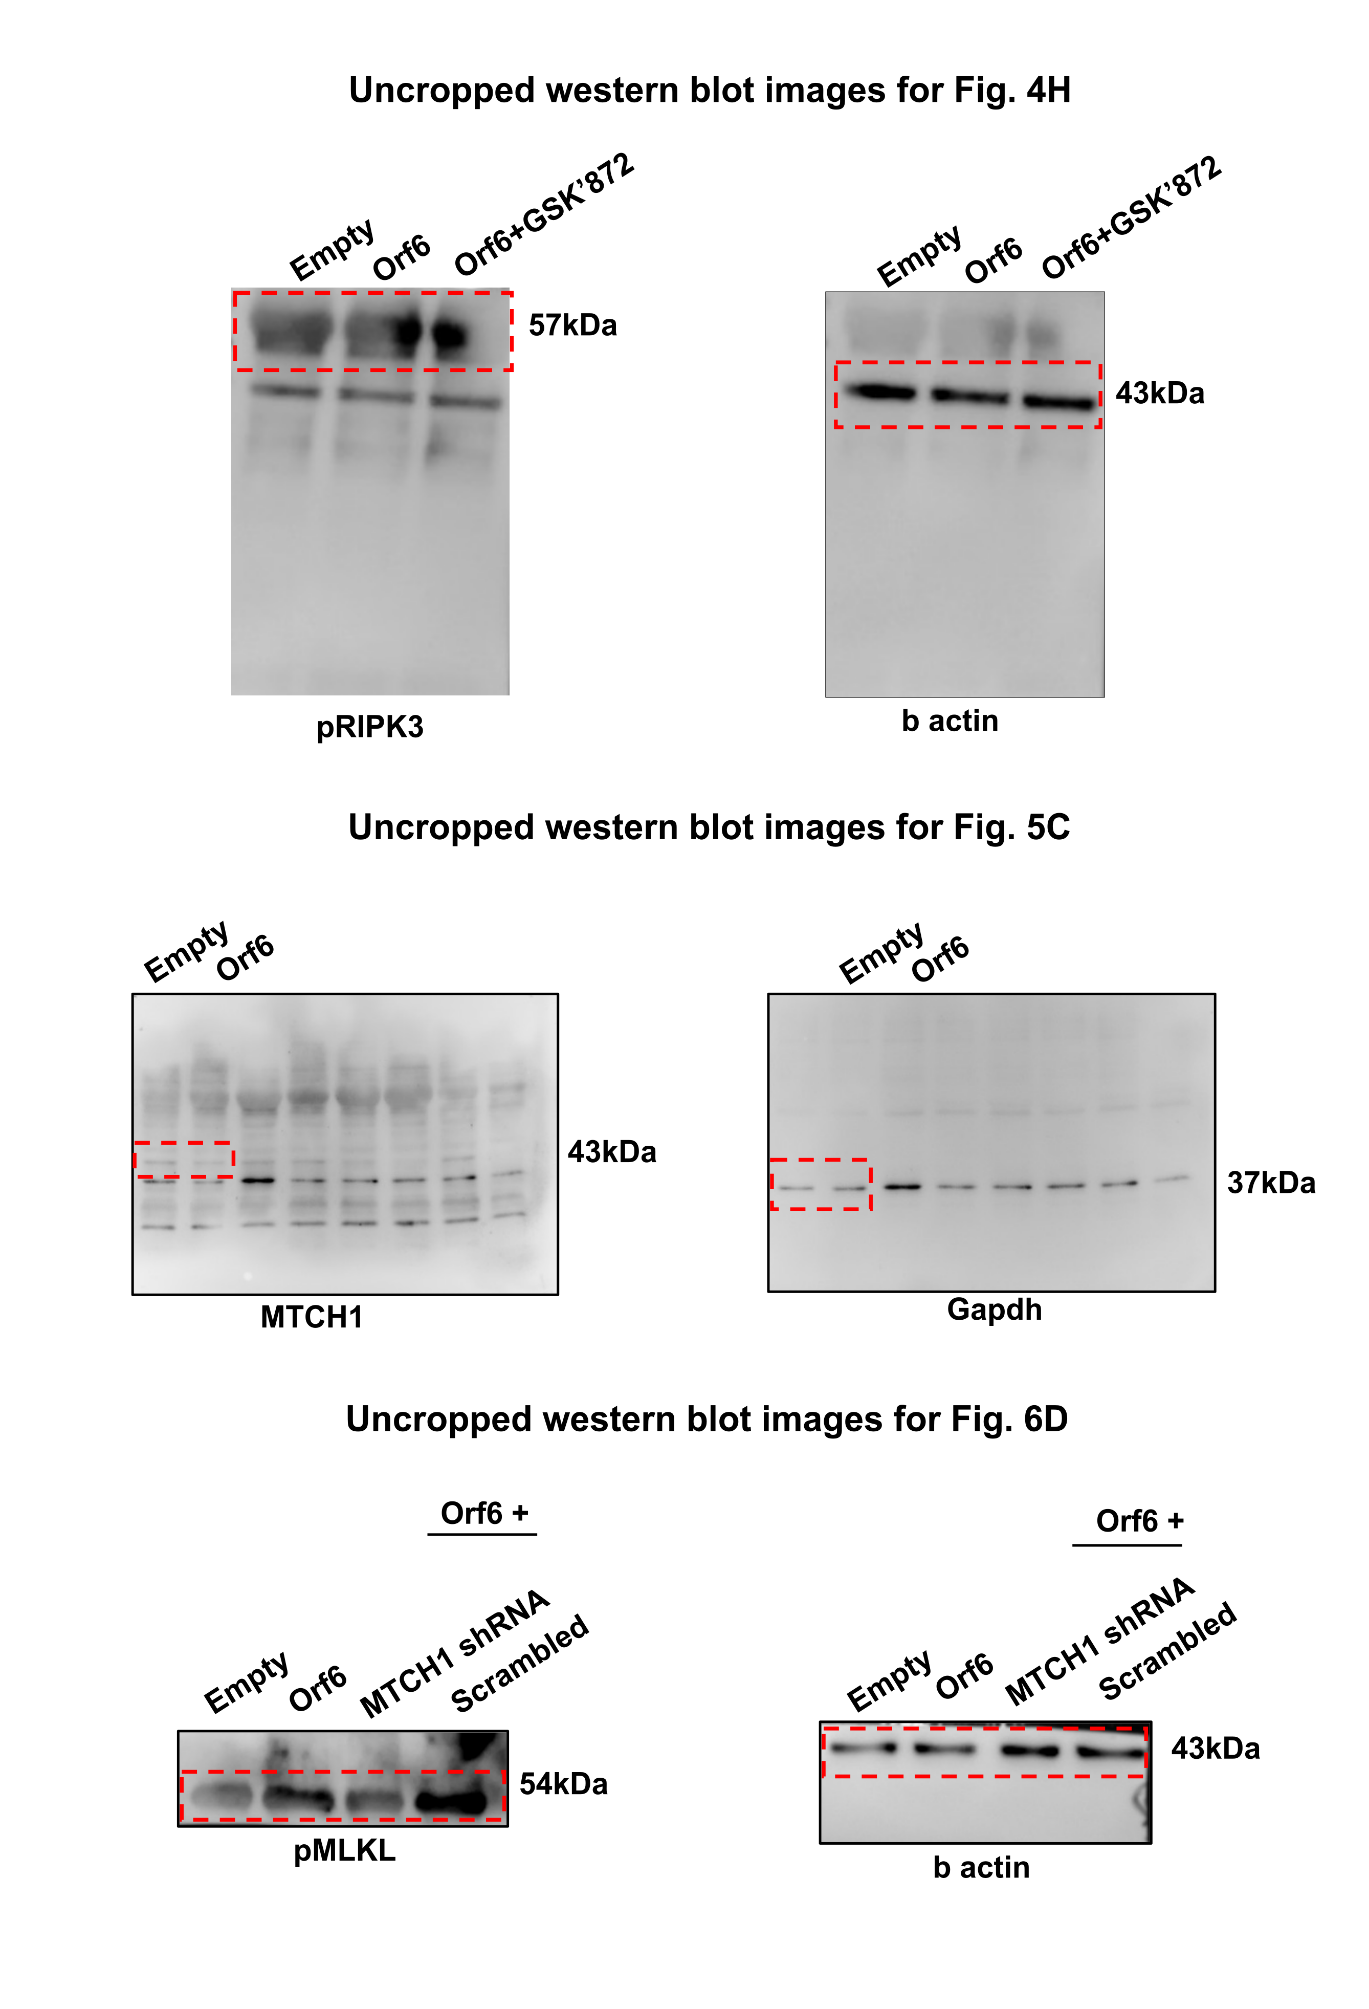

Supplement: Supplementary file 1 [file 0fc4ef45e4641bb865eb17dc.docx]
